# Supplementary material for: Leiomyogenic Tumor of the Spine: A Systematic Review
Source: MDPI journal article supplement (doi:10.3390/cancers16040748), 2024-02-10
Supplement: s1 [file s1]

**Table 1.** Summary Data from Included Studies.

| Author         | Case Number | Year | Age | Gender | Tumor Location            | Primary Treatment Modality                      | Adjuvant Therapy                     | Long Term Outcomes  | Status [A/D] |
|----------------|-------------|------|-----|--------|---------------------------|-------------------------------------------------|--------------------------------------|---------------------|--------------|
| Kang et al     | 1           | 2011 | 30  | F      | Thoracic Spine            | Fixation and Resection                          | Resection and Biopsy                 | Clinically Stable   | A            |
| Hekster et al  | 2           | 1994 | 43  | F      | Cervical Spine            | Decompression and Resection                     | Danazol                              | Clinically stable   | A            |
| Shirzadi et al | 3           | 2012 | 84  | F      | Lumbar Spine              | Laminectomy, Decompression, Resection, Fixation | Radiation                            | -                   | /            |
| Koda et al     | 4           | 2018 | 72  | M      | Thoracic Spine            | en bloc spondylectomy of T12                    | Radiation                            | Clinically Stable   | A            |
| Ehresman et al | 5           | 2018 | 24  | F      | Thoracic Spine            | Laminectomy, Fixation, and Resection            | Radiation                            | -                   | /            |
| Silva et al    | 6           | 2005 | 29  | F      | Thoracic and Lumbar Spine | Decompression and Resection                     | Radiation and Chemotherapy           | Clinically Stable   | /            |
| Yassaad et al  | 7           | 2016 | 37  | F      | Thoracic and Lumbar Spine | Decompression, Fixation, and Resection          | -                                    | Recurrence in Skull | D            |
| Barber et al   | 8           | 2019 | 49  | F      | Thoracic Spine            | Laminectomy and Decompression                   | Depo Lupron, Arimidex, and Radiation | Clinically Stable   | A            |

|                         |    |      |    |   |                           |                                           |                            |                           |   |
|-------------------------|----|------|----|---|---------------------------|-------------------------------------------|----------------------------|---------------------------|---|
| <b>Munjal et al</b>     | 9  | 2017 | 33 | F | Thoracic and Lumbar Spine | Laminectomy and Resection                 | -                          | Clinically Stable         | A |
| <b>Strong et al</b>     | 10 | 2015 | 52 | F | Lumbar Spine              | Laminectomy and Resection                 | Radiation and Chemotherapy | Clinically Stable         | A |
| <b>Calafiore et al</b>  | 11 | 2020 | 62 | M | Thoracic Spine            | Decompression, Fixation, and Resection    | -                          | Clinically Stable         | A |
| <b>Yang et al</b>       | 12 | 2014 | 19 | F | Thoracic Spine            | Laminectomy, Resection                    | -                          | Clinically Stable         | A |
| <b>Zong et al</b>       | 13 | 2018 | 51 | F | Lumbar Spine              | Corpectomy, Resection, and Vertebroplasty | Tamoxifen                  | Clinically Stable         | A |
| <b>Ghani et al</b>      | 14 | 2021 | 70 | F | Lumbar and Sacral Spine   | -                                         | Radiation                  | Receiving Palliative Care | A |
| <b>Patibandla et al</b> | 15 | 2017 | 48 | F | Cervical Spine            | Decompression, Resection, and Fixation    | -                          | Clinically Stable         | A |
| <b>Yang et al</b>       | 16 | 2017 | 47 | F | Thoracic Spine            | Corpectomy, Fixation, Resection           | -                          | Clinically Stable         | A |
| <b>Ahmad et al</b>      | 17 | 2017 | 47 | F | Thoracic Spine            | Decompression, Fixation, and Resection    | Radiation                  | Clinically Stable         | A |
| <b>Dohi et al</b>       | 18 | 2003 | 67 | F | Sacral Spine              | Resection                                 | Radiation                  | Clinical Deterioration    | / |

|                                  |    |      |    |   |                |                                                    |                            |                                                         |   |
|----------------------------------|----|------|----|---|----------------|----------------------------------------------------|----------------------------|---------------------------------------------------------|---|
| <b>Kim et al</b>                 | 19 | 2019 | 64 | F | Thoracic Spine | Laminectomy and Resection                          | Chemotherapy               | Clinical Deterioration                                  | D |
| <b>Alessi et al</b>              | 20 | 2003 | 43 | F | Sacral Spine   | Laminectomy and Resection                          | Chemotherapy               | Clinically Stable                                       | / |
| <b>Pluemvitayaporn et al</b>     | 21 | 2017 | 61 | F | Thoracic Spine | Total en bloc spondylectomy                        | Chemotherapy               | Clinically Stable                                       | A |
| <b>Ramirez-Villaescusa et al</b> | 22 | 2017 | 62 | F | Thoracic Spine | Total en bloc spondylectomy                        | Radiation                  | Clinically Stable                                       | A |
| <b>Iacoban et al</b>             | 23 | 2022 | 45 | M | Thoracic Spine | Corpectomy, Laminectomy, Fixation, Resection       | Radiation and Chemotherapy | -                                                       | / |
| <b>Vasudeva et al</b>            | 24 | 2017 | 62 | M | Thoracic Spine | Resection                                          | Radiation                  | Clinically Stable                                       | A |
| <b>Agarwal et al</b>             | 25 | 2017 | 50 | F | Thoracic Spine | Laminectomy Decompression, Fixation, and Resection | Chemotherapy               | Recurrence with subsequent Resection. Clinically Stable | A |
|                                  | 26 | 2017 | 45 | M | Thoracic Spine | Corpectomy, Laminectomy, Fixation                  | -                          | Clinical Deterioration                                  | D |
|                                  | 27 | 2017 | 40 | F | Thoracic Spine | Laminectomy, Fixation, and Resection               | Radiation                  | Clinically Stable                                       | A |
|                                  | 28 | 2017 | 58 | F | Thoracic Spine | Laminectomy, Fixation, Resection                   | Radiation                  | Clinically Deteriorated                                 | D |

|                       |    |      |    |   |                   |                                                            |                            |                                                                 |   |
|-----------------------|----|------|----|---|-------------------|------------------------------------------------------------|----------------------------|-----------------------------------------------------------------|---|
|                       | 29 | 2017 | 48 | M | Thoracic<br>Spine | Osteotomy,<br>Laminectomy,<br>Resection                    | Radiation,<br>Chemotherapy | Recurrence,<br>Clinical<br>Deterioration                        | D |
| <b>Inoue et al</b>    | 30 | 2020 | 58 | F | Lumbar<br>Spine   | -                                                          | Letrozole                  | Clinically<br>Stable                                            | A |
| <b>Hur et al</b>      | 31 | 2015 | 42 | F | Lumbar<br>Spine   | Paravertebral Muscle<br>Dissection, Fixation,<br>Resection | /                          | -                                                               | / |
| <b>Shimoda et al</b>  | 32 | 1998 | 61 | F | Lumbar<br>Spine   | -                                                          | -                          | Advanced<br>Metastatic<br>Disease,<br>Clinical<br>Deterioration | D |
| <b>Takemori et al</b> | 33 | 1993 | 47 | F | Thoracic<br>Spine | T8 vertebra<br>replacement                                 | Chemotherapy               | Clinically<br>Stable                                            | A |
| <b>Aksoy et al</b>    | 34 | 2002 | 70 | F | Thoracic<br>Spine | Resection                                                  | Chemotherapy               | /                                                               | / |
| <b>Arnesen et al</b>  | 35 | 1992 | 56 | F | Thoracic<br>Spine | Laminectomy,<br>Resection                                  | Radiation                  | Clinically<br>Stable                                            | A |
| <b>Nanassis et al</b> | 36 | 1999 | 46 | F | Thoracic<br>Spine | Decompression,<br>Resection                                | -                          | Metastatic<br>Disease                                           | A |
| <b>Jayakody et al</b> | 37 | 2011 | 44 | F | Thoracic<br>Spine | Fixation, Resection                                        | /                          | Receiving<br>Palliative<br>Care                                 | A |

|                      |    |      |    |   |                   |                                                      |                                                                                |                                              |   |
|----------------------|----|------|----|---|-------------------|------------------------------------------------------|--------------------------------------------------------------------------------|----------------------------------------------|---|
| <b>Lehman et al</b>  | 38 | 2007 | 45 | M | Cervical<br>Spine | Intracapsular Resection                              | Reoperation for<br>Gross Total<br>Resection,<br>Radiation, and<br>Chemotherapy | Clinically<br>Stable                         | A |
| <b>Sun et al</b>     | 39 | 2022 | 29 | M | Cervical<br>Spine | Decompression,<br>Corpectomy, Fixation,<br>Resection | Radiation and<br>Chemotherapy                                                  | Clinically<br>Stable                         | / |
| <b>Sucu et al</b>    | 40 | 2011 | 25 | F | Cervical<br>Spine | Partial spondylectomy,<br>Fixation and Resection     | Radiation and<br>Chemotherapy                                                  | Clinically<br>Stable                         | A |
| <b>Ido et al</b>     | 41 | 2002 | 83 | M | Thoracic<br>Spine | Decompression and<br>Fixation                        | /                                                                              |                                              | / |
| <b>Ziewacz et al</b> | 42 | 2012 | 25 | M | Thoracic<br>Spine | Laminectomy,<br>Vertebrectomy, and<br>Fixation       | Radiation and<br>Chemotherapy                                                  | Recurrence<br>with Clinical<br>Deterioration | D |
|                      | 43 | 2012 | 61 | F | Lumbar<br>Spine   | Laminectomy,<br>Fixation, and Resection              | Radiation and<br>Chemotherapy                                                  | Clinically<br>Stable                         | A |
|                      | 44 | 2012 | 35 | F | Thoracic<br>Spine | Laminectomy,<br>Fixation, and Resection              | Radiation and<br>Chemotherapy                                                  | Recurrence<br>with Clinical<br>Deterioration | D |
|                      | 45 | 2012 | 57 | F | Thoracic<br>Spine | Laminectomy,<br>Corpectomy, and<br>Fixation          | Radiation and<br>Chemotherapy                                                  | Recurrence<br>with Clinical<br>Deterioration | D |

|                        |    |      |    |   |                         |                                      |                            |                                                      |   |
|------------------------|----|------|----|---|-------------------------|--------------------------------------|----------------------------|------------------------------------------------------|---|
|                        | 46 | 2012 | 57 | F | Lumbar and Sacral Spine | Laminectomy and Resection            | Radiation and Chemotherapy | Recurrence with Clinical Deterioration               | D |
|                        | 47 | 2012 | 51 | F | Thoracic Spine          | Laminectomy, Fixation, and Resection | -                          | Recurrence with Clinical Deterioration               | D |
|                        | 48 | 2012 | 55 | M | Thoracic Spine          | Laminectomy, Fixation, and Resection | Radiation and Chemotherapy | Recurrence with Clinical Deterioration               | D |
|                        | 49 | 2012 | 66 | M | Thoracic Spine          | Laminectomy and Resection            | Chemotherapy               | Clinical Deterioration                               | D |
| <b>Tahara et al</b>    | 50 | 2016 | 61 | F | Thoracic                | Resection, Arterial Embolization     | Radiation                  | Clinically Stable                                    | A |
| <b>Ganau et al</b>     | 51 | 2002 | 23 | F | Lumbar and Sacral Spine | Arterial Embolization, Resection     | Radiation                  | /                                                    | / |
| <b>Elhammady et al</b> | 52 | 2007 | 45 | F | Lumbar Spine            | Corpectomy, Resection, Fixation      | Radiation and Chemotherapy | Tumor Recurrence, Clinically Stable                  | A |
|                        | 53 | 2007 | 46 | F | Thoracic Spine          | Laminectomy, Fixation                | -                          | Clinically Stable                                    | A |
|                        | 54 | 2007 | 36 | F | Lumbar Spine            | Laminectomy, Fixation                | Chemotherapy               | Clinical Deterioration 9 years after index operation | D |
|                        | 55 | 2007 | 42 | F | Lumbar Spine            | Laminectomy, Fixation                | -                          | Clinically Stable                                    | A |

|            |    |      |    |   |                                 |                                           |              |                                                                                                          |   |
|------------|----|------|----|---|---------------------------------|-------------------------------------------|--------------|----------------------------------------------------------------------------------------------------------|---|
|            | 56 | 2007 | 47 | F | Thoracic and<br>Lumbar<br>Spine | Corpectomy,<br>Decompression,<br>Fixation | Chemotherapy | Clinical<br>Deterioration<br><br>due to<br>Metastatic<br>disease 13<br>years after<br>index<br>operation | D |
| Kato et al | 57 | 2020 | 52 | F | Thoracic<br>Spine               | Total en bloc<br>spondylectomy            | -            | Tumor<br>Recurrence,<br>Clinical<br>Deterioration                                                        | D |
|            | 58 | 2020 | 59 | F | Thoracic and<br>Lumbar<br>Spine | Total en bloc<br>spondylectomy            | -            | Clinical<br>Deterioration                                                                                | D |
|            | 59 | 2020 | 49 | M | Thoracic<br>Spine               | Total en bloc<br>spondylectomy            | Chemotherapy | Clinical<br>Deterioration                                                                                | D |
|            | 60 | 2020 | 56 | M | Lumbar<br>Spine                 | Total en bloc<br>spondylectomy            | -            | Clinical<br>Deterioration                                                                                | D |
|            | 61 | 2020 | 62 | F | Thoracic<br>Spine               | Total en bloc<br>spondylectomy            | Chemotherapy | Clinical<br>Deterioration                                                                                | D |
|            | 62 | 2020 | 69 | M | Thoracic<br>Spine               | Total en bloc<br>spondylectomy            | Chemotherapy | Clinical<br>Deterioration                                                                                | D |
|            | 63 | 2020 | 24 | F | Thoracic<br>Spine               | Total en bloc<br>spondylectomy            | Chemotherapy | Clinical<br>Deterioration                                                                                | D |
|            | 64 | 2020 | 57 | M | Thoracic<br>Spine               | Total en bloc<br>spondylectomy            | Chemotherapy | Clinically<br>Stable                                                                                     | A |

|            |    |      |    |   |                             |                             |                                  |                                     |   |
|------------|----|------|----|---|-----------------------------|-----------------------------|----------------------------------|-------------------------------------|---|
|            | 65 | 2020 | 56 | M | Thoracic Spine              | Total en bloc spondylectomy | -                                | Clinical Deterioration              | D |
|            | 66 | 2020 | 44 | F | Lumbar Spine                | Total en bloc spondylectomy | Chemotherapy and Radiation       | Tumor Recurrence, Clinically Stable | A |
| Xiao et al | 67 | 2019 | 61 | F | Lumbar Spine                | Resection, Fixation         | Bisphosphonate                   | Clinically Stable                   | A |
|            | 68 | 2019 | 49 | F | Thoracic Spine              | Resection, Fixation         | Chemotherapy                     | Clinical Deterioration              | D |
|            | 69 | 2019 | 56 | M | Lumbar and Sacral Spine     | Resection, Fixation         | Chemotherapy                     | Clinically Stable                   | A |
|            | 70 | 2019 | 22 | F | Cervical and Thoracic Spine | Resection, Fixation         | -                                | Clinically Stable                   | A |
|            | 71 | 2019 | 34 | M | Lumbar Spine                | Resection, Fixation         | -                                | Clinically Stable                   | A |
|            | 72 | 2019 | 44 | F | Lumbar Spine                | Resection, Fixation         | -                                | Clinically Stable                   | A |
|            | 73 | 2019 | 49 | F | Cervical Spine              | Resection, Fixation         | Chemotherapy and Bisphosphonates | Clinically Stable                   | A |
|            | 74 | 2019 | 55 | F | Lumbar Spine                | Resection, Fixation         | -                                | Clinically Stable                   | A |
|            | 75 | 2019 | 55 | F | Lumbar Spine                | Resection, Fixation         | Bisphosphonates                  | Clinically Stable                   | A |
|            | 76 | 2019 | 51 | F | Sacral Spine                | Resection, Fixation         | Radiation                        | Clinically Stable                   | A |



|                        |    |      |    |   |                                   |                                         |                                        |                                                     |   |
|------------------------|----|------|----|---|-----------------------------------|-----------------------------------------|----------------------------------------|-----------------------------------------------------|---|
|                        | 77 | 2019 | 47 | F | Lumbar<br>Spine                   | Resection, Fixation                     | -                                      | Clinically<br>Stable                                | A |
|                        | 78 | 2019 | 73 | M | Thoracic<br>Spine                 | Resection, Fixation                     | Chemotherapy<br>and<br>Bisphosphonates | Clinically<br>Stable                                | A |
| <b>Elmaci et al</b>    | 79 | 2021 | 34 | F | -                                 | -                                       | Radiation and<br>Chemotherapy          | Clinically<br>Stable                                | A |
| <b>Tan et al</b>       | 80 | 2013 | 44 | F | Cervical and<br>Thoracic<br>Spine | Laminoplasty with<br>Resection          | Radiation and<br>Chemotherapy          | /                                                   | / |
| <b>Kawashima et al</b> | 81 | 2020 | 61 | M | Thoracic<br>Spine                 | Resection and Fixation                  | Radiation and<br>Chemotherapy          | Clinical<br>Deterioration                           | D |
|                        | 82 | 2020 | 47 | M | Thoracic<br>Spine                 | Laminectomy,<br>Resection, and Fixation | Radiation and<br>Chemotherapy          | Clinical<br>Deterioration                           | D |
|                        | 83 | 2020 | 48 | M | -                                 | -                                       | Radiation and<br>Chemotherapy          | Metastatic<br>Disease,<br>Clinical<br>Deterioration | D |

Table S2: Analysis of Surgical methods

|                                | <b>Average follow up time<br/>(months)</b> | <b>Resolution of symptoms<br/>(Yes, No, No Data)</b> | <b>Survival Status<br/>(Alive, Dead, No Data)</b> |
|--------------------------------|--------------------------------------------|------------------------------------------------------|---------------------------------------------------|
| Total En-bloc<br>Spondylectomy | 43                                         | 1 (8.3%),0(0.00%),11 (91.7%)                         | 4 (33.3%),8(67.3%),0 (0.0%)                       |
| Other                          | 14                                         | 19 (26.8%),9(12.7%),43(60.6%)                        | 40 (56.3%),19(26.8%),12(16.9%)                    |
